# Supplementary figures and images for: Diversification Through Gustatorial-Courtship: An X-ray Micro-Computed Tomography Study on Dwarf Spiders
Source: Research Square preprint supplement (doi:10.21203/rs.3.rs-594155/v1), 2021-06-14

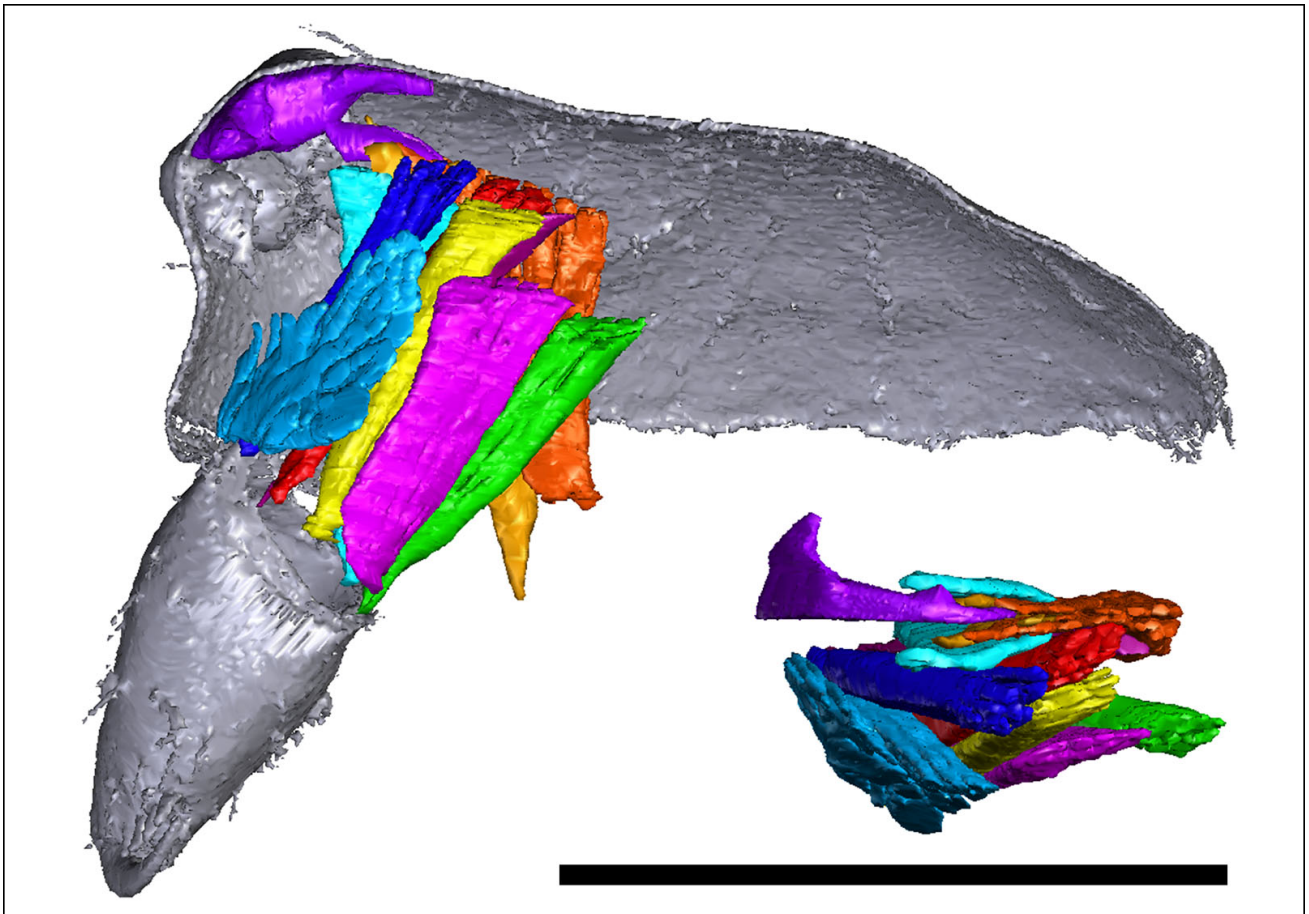

Additional file 74. Interactive 3D image of *Callitrichia pilosa* male prosoma (Fig. 14K).

Supplement: Supplementary file 5 [file c7658c4d7cf6f3d20b93946e.pdf]
